# Supplementary material for: A high-surface-area mesoporous sulfated nano-titania solid superacid catalyst with exposed (101) facets for esterification: facile preparation and catalytic performance
Source: Royal Society of Chemistry journal article supplement (doi:10.1039/c4nj00494a), 2014-06-05
Supplement: c4nj00494a5.pdf [file c4nj00494a5.pdf]

# **A high-surface-area mesoporous sulfated nano-titania solid superacid with exposed (101) facets for esterification: Facile preparation and catalytic performance**

Hui Zhao, Pingping Jiang,\* Yuming Dong, Min Huang, Boliang Liu

Key Laboratory of Food Colloids and Biotechnology (Ministry of Education of China), School of Chemical and Material Engineering Jiangnan University, Wuxi 214122, P. R. China. Fax: (+) 86-510-85913617; Tel: (+) 86-13506196132; E-mail: ppjiang@jiangnan.edu.cn

## **Supporting Information**

### ***Preparation of $SO_4^{2-}/AT_{001}$***

The sulfated anatase  $TiO_2$  with exposed (001) facets is synthesized by the modification of sulfate groups on the surface of anatase  $TiO_2$  with exposed (001) facets. The anatase  $TiO_2$  sample with exposed (001) facets is prepared using the previously reported recipe [1]. The structure of the resulting sample according to the TEM image (Fig. s1) consists of well-defined nanosheets having a rectangular shape with an average side length of ca. 50~80 nm and thickness of ca. 6 nm. The HRTEM image displayed in Fig. s2 indicates that the lattice spacing parallel to the top and bottom facets was ca. 0.235 nm, corresponding to the (001) planes of anatase  $TiO_2$ . Based on the TEM results and on the geometry of  $TiO_2$  crystals [2-4], the percentage of exposed {001} facets is estimated to be about 85 % in average. To obtain sulfated  $TiO_2$  with exposed (001) facets, the resulting  $TiO_2$  sample is annealed in the air atmosphere at 600 °C for 2 h to remove surface fluorine and then modified by surface sulfate groups. Fig. s3 shows the TEM image of the resulting sulfated  $TiO_2$ . It can be seen that the thickness of sulfated  $TiO_2$  increases to about 30~35 nm. However, the side length still keeps unchanged (about 50-80 nm). The HRTEM image in Fig. s4

indicates that the lattice fringes of 0.235 nm are well matched with the {001} planes of anatase TiO<sub>2</sub>, confirming that the sulfated TiO<sub>2</sub> sample has exposed {001} facets with percentage of ca. 70 %.

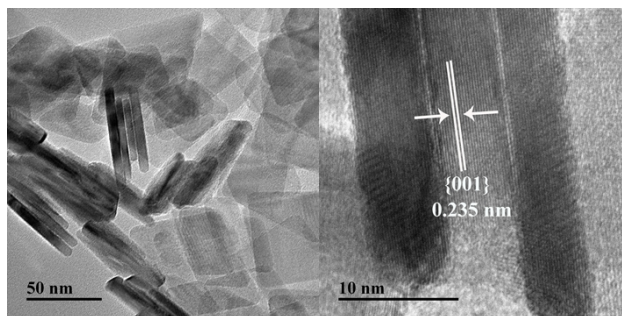

Fig. s1

Fig. s2

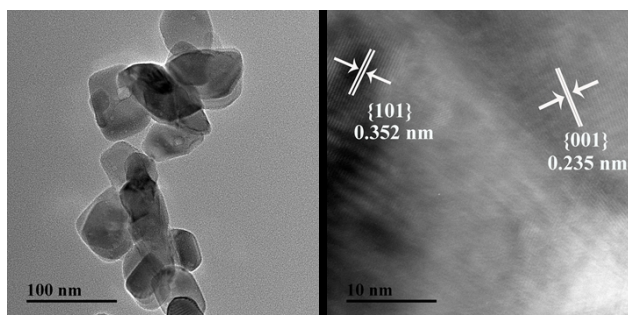

Fig. s3

Fig. s4

## References

- [1] Appl. Catal. B: Environ. 2010, 100, 378-385
- [2] Chem. Commun. 2011, 47, 4532-4534
- [3] Phys. Chem. Chem. Phys. 2011, 13, 4853-4861
- [4] J. Am. Chem. Soc. 2010, 132, 11914-11916

## *Characterization of SO<sub>4</sub><sup>2-</sup>/AT<sub>001</sub>*

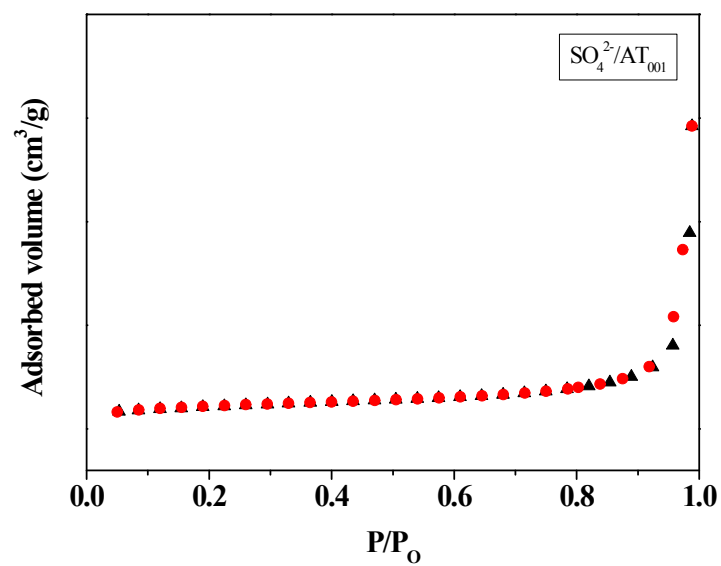

Fig. s5 Nitrogen adsorption-desorption isotherms of SO<sub>4</sub><sup>2-</sup>/AT<sub>001</sub>

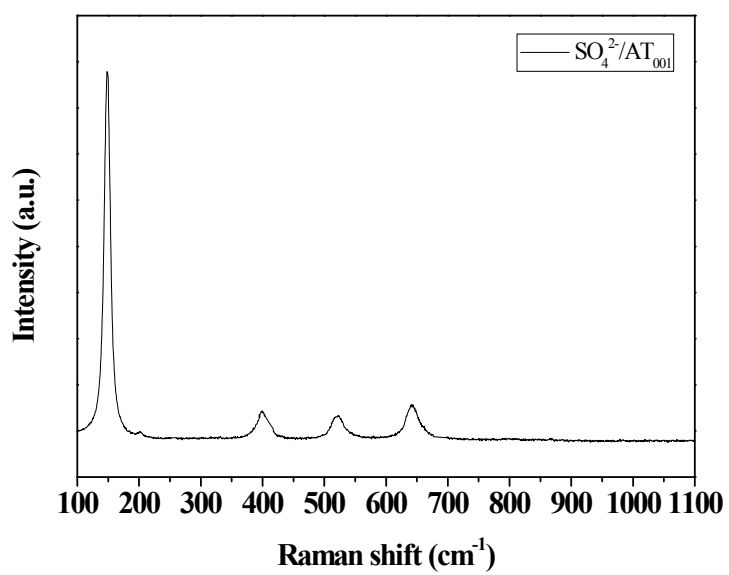

Fig. s6 Raman spectrum of SO<sub>4</sub><sup>2-</sup>/AT<sub>001</sub>

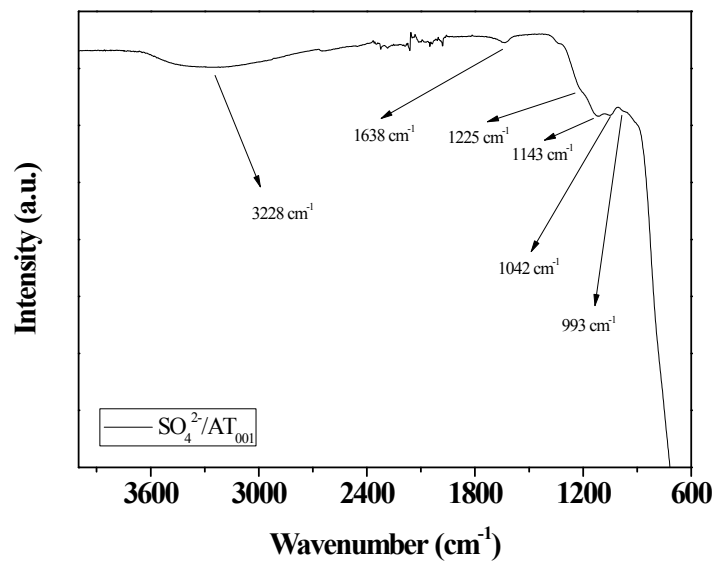

Fig.s7 FTIR spectrum of  $\text{SO}_4^{2-}/\text{AT}_{001}$

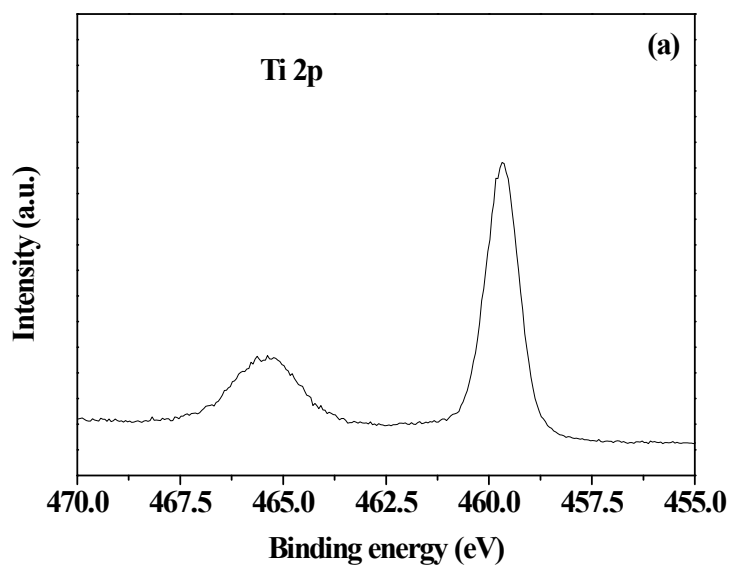

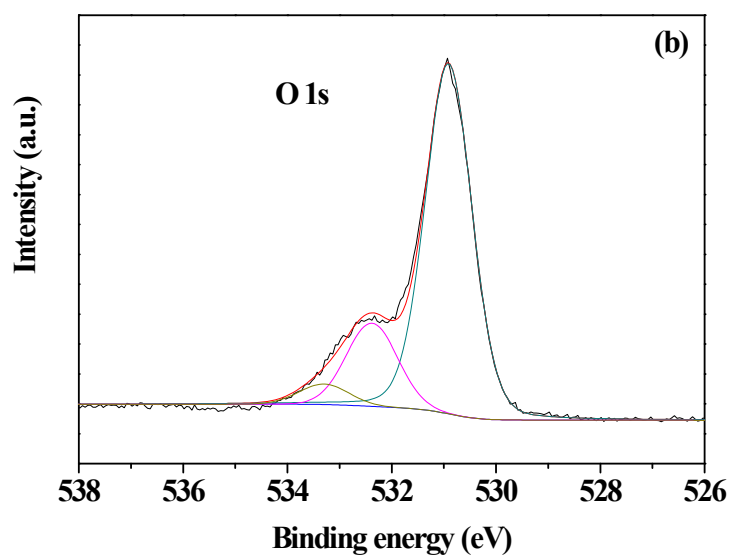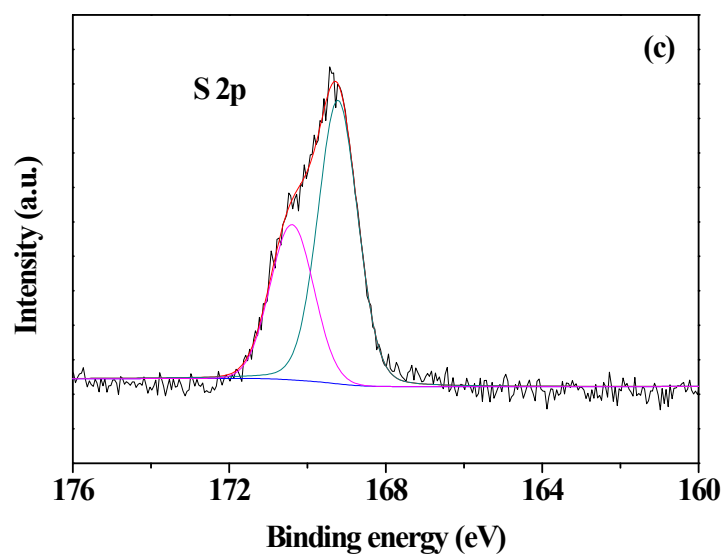

Fig. s8 High-resolution XPS spectra of Ti 2p (a), O 1s (b), S 2p (c) of  $\text{SO}_4^{2-}/\text{AT}_{001}$

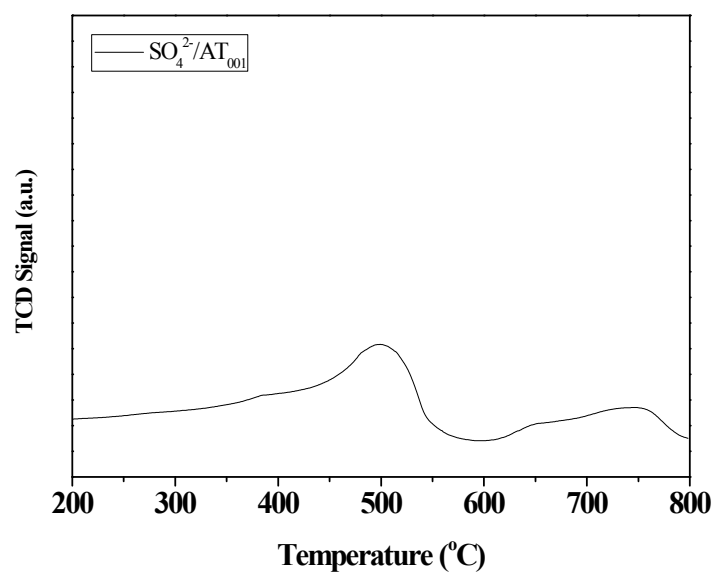

Fig. s9 The profile for temperature-programmed desorption of ammonia on the  $\text{SO}_4^{2-}/\text{AT}_{001}$

Table s1 Physicochemical parameters of samples.

| Catalyst                           | $A_{\text{BET}}^{\text{a}}$ (m <sup>2</sup> /g) | $V_{\text{tal}}^{\text{b}}$ (cm <sup>3</sup> /g) | $D_{\text{avg}}^{\text{c}}$ (nm) | $G_{\text{sul}}^{\text{d}}$ (μmol/g) | $R_{\text{S/Ti}}^{\text{e}}$ (%) |
|------------------------------------|-------------------------------------------------|--------------------------------------------------|----------------------------------|--------------------------------------|----------------------------------|
| $\text{SO}_4^{2-}/\text{AT}_{001}$ | 26                                              | 0.11                                             | 24.1                             | 469.7                                | 13.8                             |

<sup>a</sup> BET surface area. <sup>b</sup> Total pore volume. <sup>c</sup> Average pore diameter. <sup>d</sup> Amount of surface sulfate groups. <sup>e</sup> Surface S/Ti atomic ratio.
