# Supplementary figures and images for: A high-surface-area mesoporous sulfated nano-titania solid superacid catalyst with exposed (101) facets for esterification: facile preparation and catalytic performance
Source: Royal Society of Chemistry journal article supplement (doi:10.1039/c4nj00494a), 2014-06-05

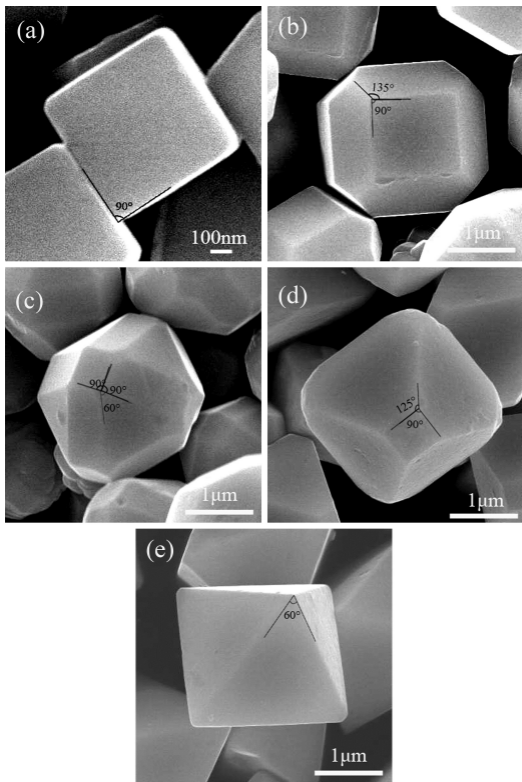

Supplement: c4nj00494a1.pdf [file c4nj00494a1.pdf]

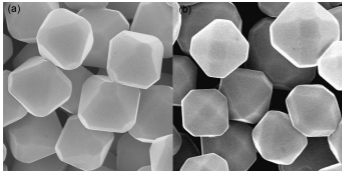

Supplement: c4nj00494a2.pdf [file c4nj00494a2.pdf]

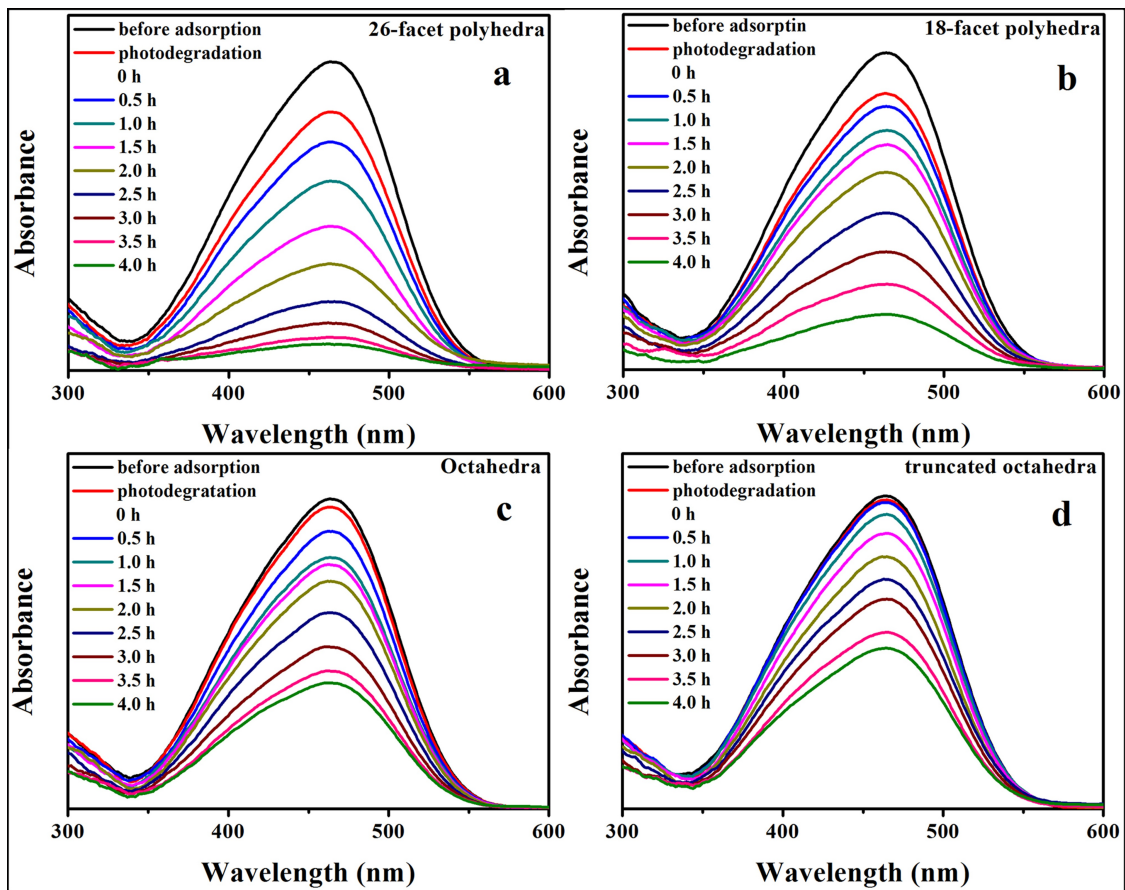

Supplement: c4nj00494a3.pdf [file c4nj00494a3.pdf]

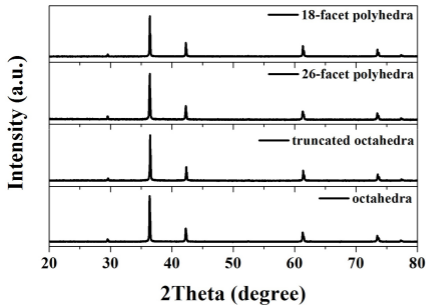

Supplement: c4nj00494a4.pdf [file c4nj00494a4.pdf]
